# Supplementary material
Source: Elsevier journal article supplement (https://www.sciencedirect.com/science/article/pii/S1138359320301544)
Supplement: mmc1 [file S1138359320301544:mmc1.doc]

**ANEXOS**

**ANEXO I. ENCUESTA A PROFESIONALES DE ATENCIÓN PRIMARIA, SOBRE LA IMPORTANCIA DE LA PRESCRIPCIÓN DE EJERCICIO FÍSICO EN PACIENTES CON RIESGO CARDIOVASCULAR.**

Por favor marque con una cruz la respuesta más adecuada (Solo una respuesta) y opine sobre la oportunidad de realizar la pregunta.

**BLOQUE I: DATOS GENERALES**

1. ¿Cuál es su puesto de trabajo?: * Médico * Enfermera/o

2. Sexo: * Hombre * Mujer

3. Año de terminación de sus estudios universitarios en Medicina/Enfermería:

4. Año de nacimiento:

5. ¿Cuántos días practica Ejercicio Físico a la semana (se considera ejercicio la práctica planeada y repetitiva de movimientos corporales encaminada a mantener o mejorar la forma física)?

a) Nunca

b) 1 a 2 días por semana

c) 3 a 5 días por semana

d) 6 a 7 días por semana

| **Pregunta a incluir:** | **SI** | **NO** |
| --- | --- | --- |
| **Observaciones:** | | |

**BLOQUE II: PRESCRIPCIÓN DE EJERCICIO GENERAL (CONOCIMIENTOS)**

Las siguientes preguntas no suponen un examen, por tanto no es necesario buscar la respuesta en libros o publicaciones, sino responder relajadamente aquello que considere más apropiado y anotar en el recuadro inferior si su contestación es segura o tiene dudas.

**LÍPIDOS**

1. REFERIDO al perfil lipídico el ejercicio físico: **(b)**

a) Aumenta Triglicéridos y disminuye LDL Colesterol

b) Aumenta HDL Colesterol y disminuye Triglicéridos

c) Disminuye LDL Colesterol y Triglicéridos

d) Disminuye HDL y Aumenta LDL Colesterol

| No lo se | Tengo dudas | Casi seguro | Completamente seguro |
| --- | --- | --- | --- |

| **Pregunta a incluir:** | **SI** | **NO** |
| --- | --- | --- |
| **Observaciones:** | | |

2. Producir cambios en el perfil lipídico mediante ejercicio físico, requiere un gasto calórico: **(a)**

a) Mínimo de 1200 calorías semanales.

b) Mínimo de 1600 calorías semanales.

c) Mayor de 2500 calorías semanales.

d) Mayor de 2000 calorías semanales.

| No lo se | Tengo dudas | Casi seguro | Completamente seguro |
| --- | --- | --- | --- |

| **Pregunta a incluir:** | **SI** | **NO** |
| --- | --- | --- |
| **Observaciones:** | | |

**DIABETES**

3. Hay CONTRAINDICACIÓN ABSOLUTA para realizar ejercicio físico en el diabético, cuando existan VALORES DE GLUCEMIA BASAL, MAYORES DE: **(a)**

a) 300 mg/dl

b) 240 mg/dl

c) 200 mg/dl

d) 100 mg/dl

| No lo se | Tengo dudas | Casi seguro | Completamente seguro |
| --- | --- | --- | --- |

| **Pregunta a incluir:** | **SI** | **NO** |
| --- | --- | --- |
| **Observaciones:** | | |

4. Está DE ACUERDO que el ejercicio físico: **(a)**

a) Mejora la resistencia a la insulina en la diabetes tipo 2.

b) Dificulta el control de la diabetes tipo 2.

c) Complica el control metabólico de la diabetes tipo 1.

d) Favorece la cetoacidosis en el diabético bien controlado.

| No lo se | Tengo dudas | Casi seguro | Completamente seguro |
| --- | --- | --- | --- |

| **Pregunta a incluir:** | **SI** | **NO** |
| --- | --- | --- |
| **Observaciones:** | | |

5. Para mantener el buen estado general en paciente diabético, recomendaría la realización DIARIA de ejercicio durante AL MENOS: **(a)**

a) 20 min.

b) 40 min.

c) 60 min.

d) 80 min.

| No lo se | Tengo dudas | Casi seguro | Completamente seguro |
| --- | --- | --- | --- |

| **Pregunta a incluir:** | **SI** | **NO** |
| --- | --- | --- |
| **Observaciones:** | | |

**HIPERTENSIÓN ARTERIAL (HTA)**

6. ¿Por encima de qué cifras de PA (en mm de Hg.) es OBLIGADO tratar con fármacos antes de realizar la prescripción de ejercicio en el paciente hipertenso?: **(b)**

a) 140/90

b) 160/100

c) 180/100

d) 200/110

| No lo se | Tengo dudas | Casi seguro | Completamente seguro |
| --- | --- | --- | --- |

| **Pregunta a incluir:** | **SI** | **NO** |
| --- | --- | --- |
| **Observaciones:** | | |

7. ¿MODIFICA LAS CIFRAS TENSIONALES la práctica regular de ejercicio físico en hipertensos leves y moderados, con independencia de la disminución de peso: **(c)**

a) No las modifica

b) Disminuye solo las Diastólicas.

c) Disminuye Diastólicas y Sistólicas

d) Aumenta Diastólicas y Sistólicas

| No lo se | Tengo dudas | Casi seguro | Completamente seguro |
| --- | --- | --- | --- |

| **Pregunta a incluir:** | **SI** | **NO** |
| --- | --- | --- |
| **Observaciones:** | | |

8. En el paciente hipertenso SE DEBEN PRESCRIBIR EJERCICIOS: **(b)**

a) Solo de tipo Aeróbico.

b) Contra-Resistencia (pesas) solo en individuos entrenados.

c) Contra-Resistencia (pesas) en todos los hipertensos.

d) Contra-Resistencia (pesas) si son de intensidad moderada y bajo número de repeticiones (volumen).

| No lo se | Tengo dudas | Casi seguro | Completamente seguro |
| --- | --- | --- | --- |

| **Pregunta a incluir:** | **SI** | **NO** |
| --- | --- | --- |
| **Observaciones:** | | |

9. Practicar Ejercicio Físico durante 30 minutos a una intensidad del 50% de la frecuencia cardiaca máxima. ¿Cómo modificaría la PA?: **(b)**

a) No produce un efecto apreciable

b) Disminución transitoria en las 24 horas posteriores

c) Disminución transitoria en las 12 horas posteriores

d) Elevación transitoria en los 2 días posteriores

| No lo se | Tengo dudas | Casi seguro | Completamente seguro |
| --- | --- | --- | --- |

| **Pregunta a incluir:** | **SI** | **NO** |
| --- | --- | --- |
| **Observaciones:** | | |

**OBESIDAD**

10. PARA PERDER PESO. ¿Cuántos minutos diarios de Ejercicio Físico son necesarios, como mínimo?: **(d)**

a) Menos de 15

b) 15 a 29

c) 30 a 44

d) 45 a 60

| No lo se | Tengo dudas | Casi seguro | Completamente seguro |
| --- | --- | --- | --- |

| **Pregunta a incluir:** | **SI** | **NO** |
| --- | --- | --- |
| **Observaciones:** | | |

11. Con independencia del exceso de peso del individuo. ¿Qué gasto calórico (calorías) semanal se estima necesario para conseguir ADELGAZAMIENTO?: **(c)**

a) 1000 cal

b) 1500 cal

c) 2000 cal

d) 2500 cal

| No lo se | Tengo dudas | Casi seguro | Completamente seguro |
| --- | --- | --- | --- |

| **Pregunta a incluir:** | **SI** | **NO** |
| --- | --- | --- |
| **Observaciones:** | | |

12. Para conseguir que un paciente obeso pierda peso mediante un programa de ejercicio físico y dieta, intentaría un OBJETIVO de: **(c)**

a) Alcanzar rápidamente un Índice de Masa Corporal (IMC) < 25.

b) Alcanzar rápidamente un IMC < 30.

c) Conseguir un balance negativo de 500 a 1000 calorías/día.

d) Conseguir un balance negativo de 1500 calorías/día.

| No lo se | Tengo dudas | Casi seguro | Completamente seguro |
| --- | --- | --- | --- |

| **Pregunta a incluir:** | **SI** | **NO** |
| --- | --- | --- |
| **Observaciones:** | | |

**GENERAL**

13. ¿El número MÍNIMO DE SESIONES SEMANALES Y LA INTENSIDAD de Ejercicio Físico recomendable para conseguir beneficios para la salud sería? **(d)**

a) Ejercicio diario de intensidad leve o moderada durante un total de 30 minutos diarios.

b) Cinco o más días por semana con Ejercicios de intensidad moderada durante un total de 30 minutos diarios.

c) Tres o más días por semana de Ejercicio de intensidad elevada en sesiones de al menos 20 a 60 minutos por sesión.

d) En cualquiera de las situaciones anteriores.

| No lo se | Tengo dudas | Casi seguro | Completamente seguro |
| --- | --- | --- | --- |

| **Pregunta a incluir:** | **SI** | **NO** |
| --- | --- | --- |
| **Observaciones:** | | |

14. De los ejercicios que se citan a continuación ¿Cuál considera MÁS AERÓBICO?:**(d)**

a) Halterofilia (levantamiento de pesas).

b) Culturismo.

c) Carrera de 100 m lisos.

d) Carrera de 3000 m lisos.

| No lo se | Tengo dudas | Casi seguro | Completamente seguro |
| --- | --- | --- | --- |

| **Pregunta a incluir:** | **SI** | **NO** |
| --- | --- | --- |
| **Observaciones:** | | |

15. Recomendaría la realización de ESTIRAMIENTOS MUSCULARES tras una sesión de Ejercicio Físico (Ejercicios de vuelta a la calma) por: **(d)**

a) Evitan la disminución de la hipotensión que se produce al parar bruscamente.

b) Disminuyen teóricamente la aparición de complicaciones cardiovasculares.

c) Facilitan la recuperación al eliminar el Ácido Láctico del músculo.

d) Todas las anteriores son ciertas.

| No lo se | Tengo dudas | Casi seguro | Completamente seguro |
| --- | --- | --- | --- |

| **Pregunta a incluir:** | **SI** | **NO** |
| --- | --- | --- |
| **Observaciones:** | | |

16. En qué situaciones se debe realizar una EXPLORACIÓN CARDIOVASCULAR (auscultación, ECG y/o prueba de esfuerzo) antes de prescribir la práctica de Ejercicio Físico: **(c)**

a) No está indicada.

b) Pacientes que vayan a realizar Ejercicios de intensidad leve o moderada, independientemente de la edad.

c) Cuando existan más de 2 factores de riesgo y se plantee realizar ejercicio de intensidad elevada.

d) En todos los casos.

| No lo se | Tengo dudas | Casi seguro | Completamente seguro |
| --- | --- | --- | --- |

| **Pregunta a incluir:** | **SI** | **NO** |
| --- | --- | --- |
| **Observaciones:** | | |

17. En relación a las AGUJETAS considera que: **(b)**

a) Ingerir abundantes líquidos azucarados evita la formación de cristales de ácido láctico entre las fibras musculares.

b) Son pequeñas roturas de fibras musculares sin mayor importancia y pueden ser tratadas con analgésicos.

c) Ingerir bicarbonato previene su aparición.

d) No están relacionadas con la forma física previa a la realización del ejercicio.

| No lo se | Tengo dudas | Casi seguro | Completamente seguro |
| --- | --- | --- | --- |

| **Pregunta a incluir:** | **SI** | **NO** |
| --- | --- | --- |
| **Observaciones:** | | |

18. ¿Cual de las siguientes fórmulas permite CALCULAR la Frecuencia Cardiaca Máxima (FMC) en un varón?: **(b)**

a) FCM = 200 – edad (años) x (% intensidad de ejercicio).

b) FCM = 220 – edad (años) x (% intensidad de ejercicio).

c) FCM = años x 45 x (% intensidad de ejercicio) + 10.

d) FCM = pulso basal x 2 x (% intensidad de ejercicio) + edad -10.

| No lo se | Tengo dudas | Casi seguro | Completamente seguro |
| --- | --- | --- | --- |

| **Pregunta a incluir:** | **SI** | **NO** |
| --- | --- | --- |
| **Observaciones:** | | |

19. ¿A qué EQUIVALE 1 MET (Equivalente metabólico estándar)?: **(a)**

a) Al gasto energético que se produce durante 1 minuto de reposo absoluto.

b) Al gasto energético que se produce durante 1 minuto de ejercicio con una frecuencia cardiaca del 50% de la frecuencia cardiaca máxima.

c) Al consumo de Oxígeno durante 1 minuto de reposo absoluto.

d) Al consumo de Oxígeno durante 1 minuto de ejercicio con una frecuencia cardiaca del 50% de la frecuencia cardiaca máxima.

| No lo se | Tengo dudas | Casi seguro | Completamente seguro |
| --- | --- | --- | --- |

| **Pregunta a incluir:** | **SI** | **NO** |
| --- | --- | --- |
| **Observaciones:** | | |

**III PRESCRIPCIÓN DE EJERCICIO ESPECÍFICO**

1. En su consulta diaria; ¿A qué proporción de pacientes con riesgo cardiovascular, INDICA la práctica de ejercicio físico? (señale solo 1 contestación):

a) No suele indicar ejercicio físico.

b) Menos del 30%.

c) Del 31 al 69 %.

d) Más del 70%.

| **Pregunta a incluir:** | **SI** | **NO** |
| --- | --- | --- |
| **Observaciones:** | | |

2. En su consulta habitual, ¿En cuántas ocasiones ESPECÍFICA el tiempo diario o semanal que debe realizar ejercicio para conseguir los objetivos propuestos?:

- 1. Muy raramente
  2. Menos del 30%
  3. Del 31 al 69 %
  4. Más del 70%

| **Pregunta a incluir:** | **SI** | **NO** |
| --- | --- | --- |
| **Observaciones:** | | |

3. Recomienda a sus pacientes TOMARSE EL PULSO durante el Ejercicio de forma manual o instrumentos como el pulsímetro (señale solo 1 contestación).

a) Nunca.

b) Solo si el nivel cultural lo permite.

c) En 1 de cada 10 prescripciones.

d) En más de 5 de cada diez prescripciones.

| **Pregunta a incluir:** | **SI** | **NO** |
| --- | --- | --- |
| **Observaciones:** | | |

4. ¿RECOMIENDA a los pacientes con SÍNDROME METABÓLICO la realización de Ejercicio Físico?

a) Muy raramente.

b) Menos del 30%.

c) Del 31 al 69 %.

d) Más del 70%.

| **Pregunta a incluir:** | **SI** | **NO** |
| --- | --- | --- |
| **Observaciones:** | | |

5. ¿Conoce alguna GUÍA DE PRÁCTICA CLÍNICA sobre ejercicio físico? (escriba la Institución o fuente patrocinadora)

………………………………………………………………………………………………………….

| **Pregunta a incluir:** | **SI** | **NO** |
| --- | --- | --- |
| **Observaciones:** | | |

**IV OPINIÓN**

1. Considera que SUS CONOCIMIENTOS son SUFICIENTES para realizar una adecuada prescripción de Ejercicio Físico. (puntúe de 1 Muy Insuficiente a 4 Muy Adecuado)

| 1 | 2 | 3 | 4 |
| --- | --- | --- | --- |

| **Pregunta a incluir:** | **SI** | **NO** |
| --- | --- | --- |
| **Observaciones:** | | |

2. ¿Hace algún tipo de SEGUIMIENTO del cumplimiento de la prescripción de Ejercicio Físico por sus pacientes?

a) Si, aprovechando visitas por otros motivos.

b) Si, en consulta programada de enfermedades crónicas.

c) De forma esporádica a demanda del paciente.

d) Nunca revisa la cumplimentación de ejercicio físico.

| **Pregunta a incluir:** | **SI** | **NO** |
| --- | --- | --- |
| **Observaciones:** | | |

3. ¿Qué VALORACIÓN GLOBAL o comentarios tienes sobre la encuesta: (Útil, redacción adecuada, fácil de realizar, demasiado extensa y todo aquello que consideres oportuno)

| **Observaciones al cuestionario:** |
| --- |

**Por último agradecer muy sinceramente tu colaboración como experto en la elaboración de este instrumento de medida.**
